# Supplementary material
Source: ML conference proceedings conference paper supplement (https://proceedings.neurips.cc/paper_files/paper/2022/hash/1548d98b62d3a4382a31ba77d89186cd-Abstract.html)
Supplement: Supplementary file 1 [file 1548d98b62d3a4382a31ba77d89186cd-Supplemental-Conference.zip]

Archive with 6 entries (6 files):
- Appendix.pdf
- Labeling_Guidelines_User Study_Figure1b.pdf
- Labeling_Guidelines_User Study_Table3.pdf
- Screenshot_User_Study_Figure1b.PNG
- Screenshot_User_Study_Table3_1.PNG
- Screenshot_User_Study_Table3_2.PNG
