# Supplementary material
Source: ML conference proceedings conference paper supplement (https://proceedings.neurips.cc/paper_files/paper/2022/hash/1548d98b62d3a4382a31ba77d89186cd-Abstract.html)

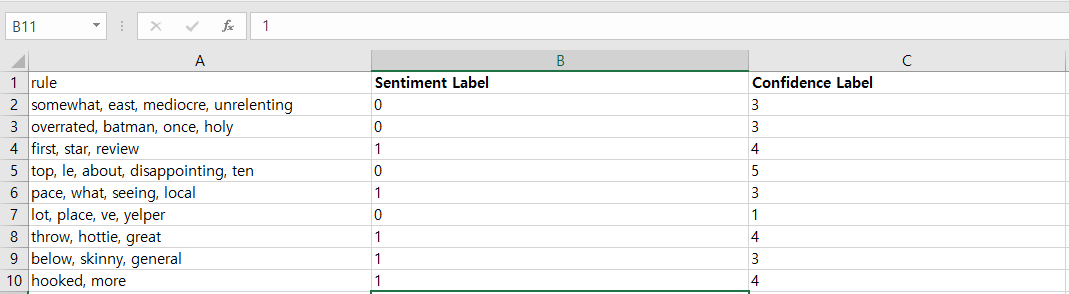

Supplement: Supplementary file 1 [file 1548d98b62d3a4382a31ba77d89186cd-Supplemental-Conference.zip › Screenshot_User_Study_Figure1b.PNG]

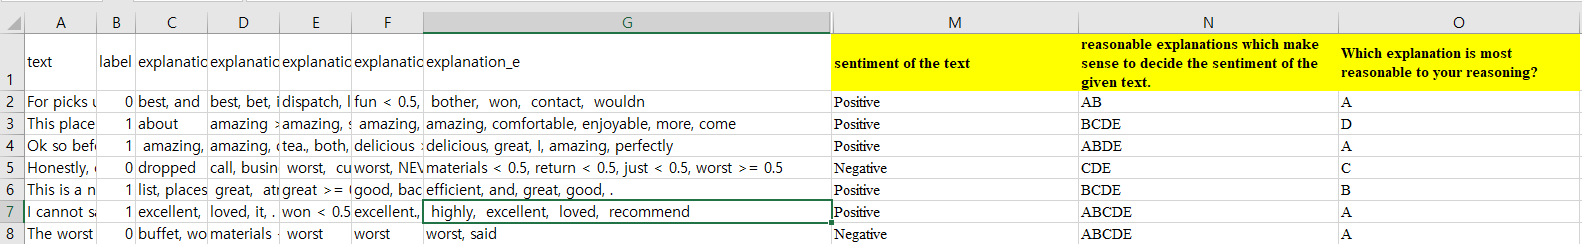

Supplement: Supplementary file 1 [file 1548d98b62d3a4382a31ba77d89186cd-Supplemental-Conference.zip › Screenshot_User_Study_Table3_1.PNG]

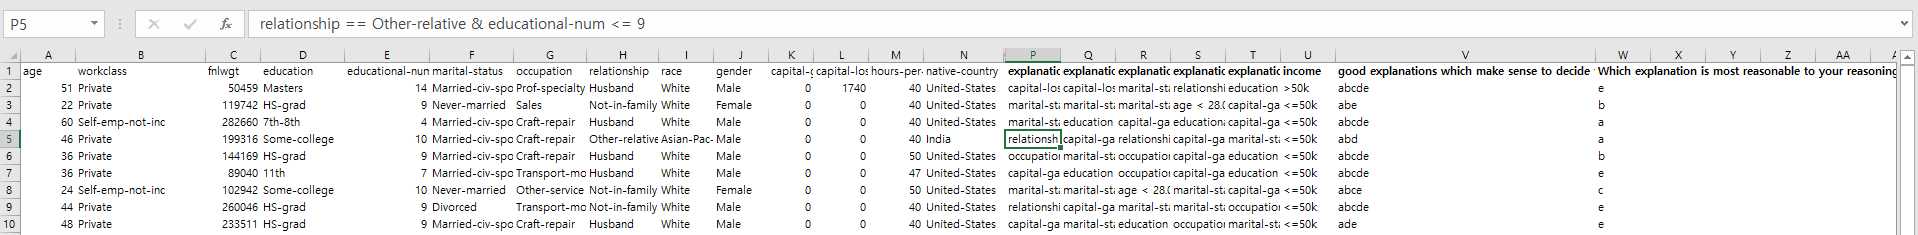

Supplement: Supplementary file 1 [file 1548d98b62d3a4382a31ba77d89186cd-Supplemental-Conference.zip › Screenshot_User_Study_Table3_2.PNG]
